# Supplementary material
Source: Springer Nature journal article supplement (https://www.springermedizin.de/resource/supplementary/13102_2013_26_MOESM3_ESM.pdf/9686434)

● Breaststroke  
○ Freestyle

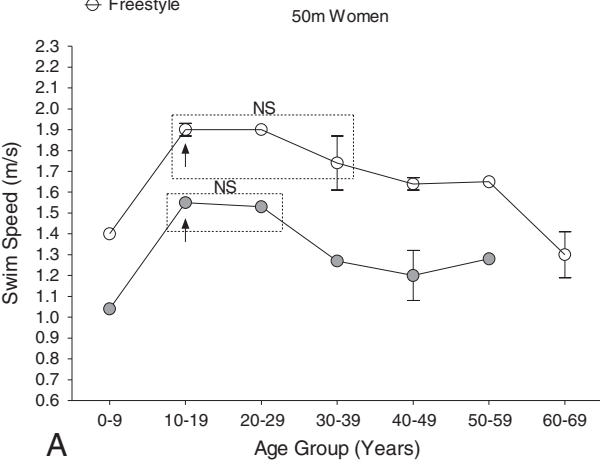

A

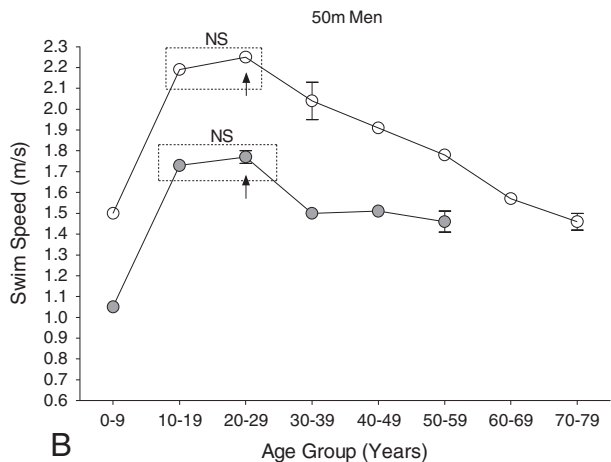

B

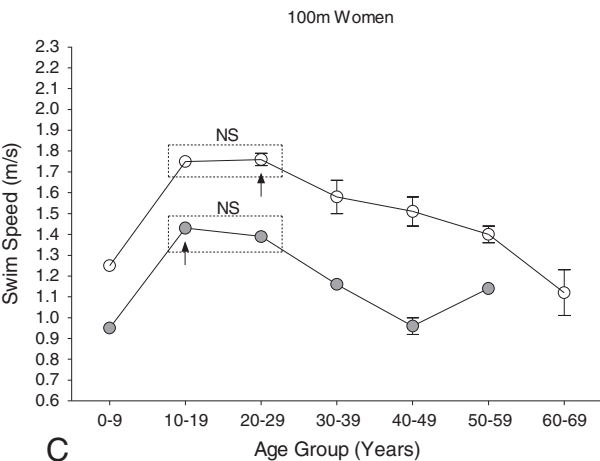

C

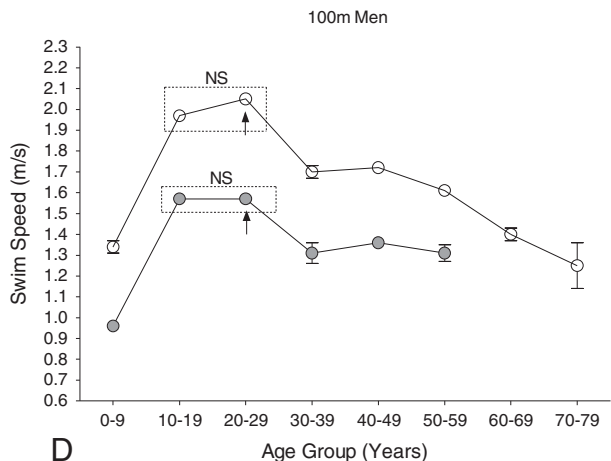

D

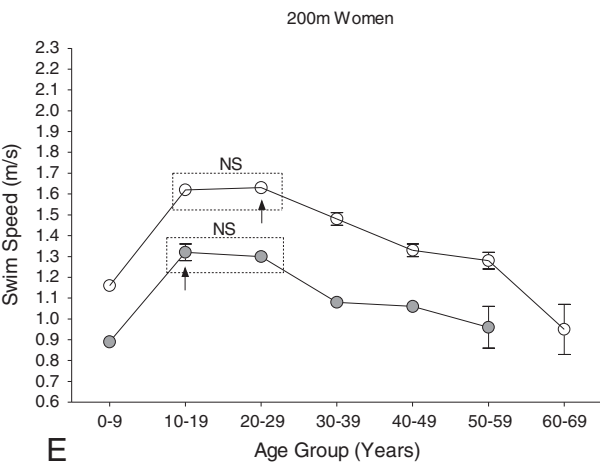

E

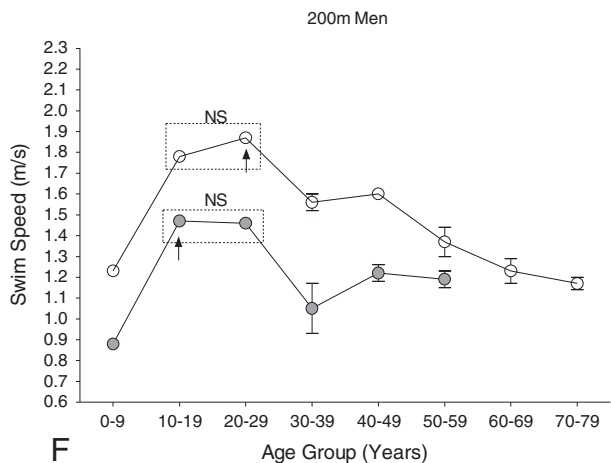

F

Supplement: MOESM3 [file 9686434]
